# Supplementary material for: Systems Modeling of Molecular Mechanisms Controlling Cytokine-driven CD4+ T Cell Differentiation and Phenotype Plasticity
Source: PLoS Comput Biol. 2013 Apr 4;9(4):e1003027. doi: 10.1371/journal.pcbi.1003027 (PMC3617204; doi:10.1371/journal.pcbi.1003027)
Supplement: Table S1 — Calibration database to adjust parameters on the CD4+ T cell computational model. Data is represented as either external inputs for the model or internal readings. The external cytokines (external input) will trigger different phenotype induction depending on the concentration. Consequently, different cytokines and transcription factors will be upregulated (internal readings). (XLSX) [file pcbi.1003027.s014.xlsx]

## Sheet: Sheet1
			External cytokines: INPUT for CALIBRATION													Internal concentrations: OUTPUT for calibration
	Cell type	PMID	Input-anti-CD3	Input-anti-CD28	Input-IL-2	Input-IL-3	Input-IL-12	Input_IL-18	Input-IL-4	Input-anti-IL-4	Input-anti-IFNy	Input-IL-6	Input-TGFb	Input-anti-IL12	Input-IL23	[IFNy]_SS	[IL-10]_0	[IL-2]_SS	[IL-4]_SS	[IL17]_0	[IL17]_SS	[IL23R]_SS	[FoxP3]_SS	[FoxP3]_R-SS	[IL17A]_R-SS	Last
	Th1	17658279	1	1	0.002	0	0.0035	0	0	10	0	0	0	0	0	0.3										-1
	Th1	17658279	1	1	0.002	0	0.0035	0	0	10	0	0	0	0	0	0.6										-1
	Th1	12006974	0	0	0	0	0.001	0	0	10	0	0	0	0	0	0.2										-1
	Th1	12006974	0	0	0	0	0.001	0	0	10	0	0	0	0	0	0.165										-1
	Th1	12006974	0	0	0	0	0.001	0	0	10	0	0	0	0	0	0.205										-1
	Th1	12006974	0	0	0	0	0.001	0	0	10	0	0	0	0	0	0.07										-1
	Th1	9558063	0	0	0	0	0	1e-05	0	0	0	0	0	0	0	0.0002875										-1
	Th1	9558063	0	0	0	0	0	0.0001	0	0	0	0	0	0	0	0.0003625										-1
	Th1	9558063	0	0	0	0	0	0.001	0	0	0	0	0	0	0	0.000325										-1
	Th1	9558063	0	0	0	0	0	0.01	0	0	0	0	0	0	0	0.001										-1
	Th1	9558063	0	0	0	0	0	0.02	0	0	0	0	0	0	0	0.00085										-1
	Th1	9558063	0	0	0	0	0	0.2	0	0	0	0	0	0	0	0.0006375										-1
	Th1	9558063	0	0	0	0	0.001	0	0	0	0	0	0	0	0	0.0002875										-1
	Th1	9558063	0	0	0	0	0.01	0	0	0	0	0	0	0	0	0.0004375										-1
	Th1	9558063	0	0	0	0	0.1	0	0	0	0	0	0	0	0	0.0004										-1
	Th1	9558063	0	0	0	0	1	0	0	0	0	0	0	0	0	0.0006										-1
	Th1	11801649	0	0	0	0	0.00025	0	0	0	0	0	0	0	0	0.004211										-1
	Th1	11801649	0	0	0	0	0	0.1	0	0	0	0	0	0	0	0.055263										-1
	Th1	11801649	0	0	0	0	0.00025	0.1	0	0	0	0	0	0	0	0.054211										-1
	Th1	9177292	1	0	0	0	0	0.001	0	0	0	0	0	0	0			2.1622e-05								-1
	Th1	9177292	1	0	0	0	0	0.01	0	0	0	0	0	0	0			0.000337838								-1
	Th1	in-house data	0	0	0	0	0.1	0	0	0.1	0	0	0	0	0	3e-07										-1
	Th1		0	0	0	0	0.1	0	0	0.1	0	0	0	0	0	0.265084										-1
	Th1		0	0	0	0	0.1	0	0	0.1	0	0	0	0	0	0.259822										-1
	Th1		0	0	0	0	0.1	0	0	0.1	0	0	0	0	0	0.235246										-1
	Th2	17658279	1	1	0.002	0	0	0	2	0	10	0	0	0	0	0										-1
	Th2	17658279	1	1	0.002	0	0	0	2	0	10	0	0	0	0	0										-1
	Th2	12006974	0	0	0	0	0	0	0.2	0	10	0	0	3	0				0.007							-1
	Th17	in-house data	0	0	0	0	0	0	0	0	0	0.1	0.1	0	0											-1
	Th17		0	0	0	0	0	0	0	0	0	0.1	0.1	0	0											-1
	Th17		0	0	0	0	0	0	0	0	0	0.1	0.1	0	0											-1
			0	0	0	0	0	0	0	0	0	0.1	0.1	0	0											-1
	Th17	16648838	0	0	0	0	0	0	0	0	0	0.025	0.001	0	0	0.0011				0.0004	0.0008					-1
	Th17	16648838	1	0	0	0	0	0	0	0	0	0	0.003	0	0						0.155384			100	12	-1
	Th17	16648838	1	0	0	0	0	0	0	0	0	0.02	0	0	0						0.812977			2	10	-1
	Th17	16648838	1	0	0	0	0	0	0	0	0	0.02	0.003	0	0						0.985792			0.9	100	-1
	Th17	16648838	1	0	0	0	0	0	0	0	0	0	0	0	0						0.760968			3.5	0	-1
	Treg	14676299	2	2	0.02	0	0	0	0	0	0	0	0	0	0		0.001					0.9				-1
	Treg	14676299	2	2	0.02	0	0	0	0	0	0	0	0.002	0	0							1.1				-1
	Treg	14676299	2	2	0.02	0	0	0	0	0	0	0	0.02	0	0							1				-1
	Treg	14676299	2	2	0.02	0	0	0	0	0	0	0	0	0	0							0.8				-1
	Treg	17475784	0.01	0	0	0	0	0	0	0	0	0	0.002	0	0								0.8			-1

## Sheet: Sheet4
Cell type information	Cell type	Initials	Referece Link	Sources of Differences	Input-anti-CD3	Input-anti-CD28	Input-IL-2	Input-IL-3	Input-IL-12	Input_IL-18	Input-IL-4	Input-anti-IL-4	Input-anti-IFNy	Input-IL-6	Input-TGFb	Input-anti-IL12	Input-IL23	[IFNy]_0	[IFNy]_SS	[IL-10]_0	[ IL-10]_SS	[IL-2]_SS	[IL-4]_SS	[IL-5]_SS	[IL-13]_SS	[IL17]_0	[IL17]_SS	[IL21]_0	[IL21]_SS	[IL22]_SS	[IL23R]_SS	[FoxP3]_SS	[RORgt]_SS	[Tbet]_SS	Last
CD4 Treg	Treg	AC	Holly Algood Luminex data	th17	0	0	0	0	0	0	0	0	0	0.1	0.1	0	0										0.155384								-1
		AC	Holly Algood Luminex data	th17	0	0	0	0	0	0	0	0	0	0.1	0.1	0	0										0.812977
		AC	Holly Algood Luminex data	th17	0	0	0	0	0	0	0	0	0	0.1	0.1	0	0										0.985792
		AC	Holly Algood Luminex data	th17	0	0	0	0	0	0	0	0	0	0.1	0.1	0	0										0.760968
CD4 Treg	Treg	AC	Holly Algood Luminex data	th1	0	0	0	0	0.1	0	0	0.1	0	0	0	0	0		3e-07																-1
CD4 Treg	Treg	AC	Holly Algood Luminex data	th1	0	0	0	0	0.1	0	0	0.1	0	0	0	0	0		0.265084																-1
CD4 Treg	Treg	AC	Holly Algood Luminex data	th1	0	0	0	0	0.1	0	0	0.1	0	0	0	0	0		0.259822																-1
CD4+CD25-CD45RB+ T cell	Treg	AC	Holly Algood Luminex data	th1	0	0	0	0	0.1	0	0	0.1	0	0	0	0	0		0.235246																-1
