# Supplementary material for: Systems Modeling of Molecular Mechanisms Controlling Cytokine-driven CD4+ T Cell Differentiation and Phenotype Plasticity
Source: PLoS Comput Biol. 2013 Apr 4;9(4):e1003027. doi: 10.1371/journal.pcbi.1003027 (PMC3617204; doi:10.1371/journal.pcbi.1003027)
Supplement: Table S2 — Complete assessment of 7 parameter estimations performed by using COPASI's Particle Swarm algorithm with 3000 iterations and a particle size of 50 for reactions number 10, 11, 13 and 14. This table was used to compare turnover values as well as optimal gradients to choose an effective combination of parameters. (XLSX) [file pcbi.1003027.s015.xlsx]

## Sheet: Sheet1
		Treg		Th1/Th2 crosstalk		PPARγ		Th1		Th2		Th17		GLOBAL
		Value	Gradient	Value	Gradient	Value	Gradient	Value	Gradient	Value	Gradient	Value	Gradient	Value	Gradient
	(re10).K1	0.001	0	64.1808	-1.36e-14	0.0001	0	78.9493	0	4.48882	0	0.0001	0	0.125481	0
	(re10).K2	0.001	0	0.653062	-3.4e-13	0.000467	0	0.896854	2.26e-05	5.1868	0	0.002558	0	6.68935	0
	(re10).K3							0.031433	0.025928	8.8104	0	33.3943	0	68.6086	0
	(re10).K4	100	0	0.004751	-1.01e-10	0.001	0	0.033855	0	0.034989	0			66.6168	0
	(re11).K	0.001	0	129.053	-1.68e-18	616.482	0	24.2222	0	6.05458	0	72.3554	0	0.263953	-4.13e-08
	(re13).K							0.001	0	0.215051	0			1.13527	0
	(re13).K1	4.04519	0	0.804264	9.06e-07	4.66657	-8.98e-11	58.6807	0	22.7396	0	1.24514	-0.00012	5.04432	8.11e-05
	(re13).K2	20.2244	0	0.264994	2.23e-07	0.020342	0	91.0374	7.62e-17	17.3976	0	3.17239	-2.76e-06	1.65934	4.94562
	(re13).K3	63.8744	0	1.84607	3.72e-07	98.0024	0	0.234452	0	0.003972	0	4.4635	0.032907	14.9788	0.017183
	(re14).K1	99.8072	0	0.053541	-5.83e-07	0.001036	0.00176	0.11157	0	0.501917	1.13e-08	0.316136	5.1e-05	0.001061	0
	(re14).K2	13.7099	0	93.5748	-2.37e-12	1.2029	0	0.004353	0	15.0378	0	0.000103	0	0.075552	-0.00094
	(re14).K3							0.007358	0	7.06485	0			19.7117	0
	(re14).K4	16.1015	0	0.0014	1.32e-06	16.0166	0	0.001477	0.138192	32.6577	0	82.3441	0	70.3556	0
	(re14).K5	0.200742	0	0.003127	1.49e-06	99.9928	-8.39e-12	3.59161	3.7e-06	22.2073	0	100	-1.89e-10	0.016858	433.378
	(re14).K6	10.2927	0	0.001	0.29453	0.001	4.52e-05	0.230841	9.1e-08	0.001067	1.29e-08	2.59756	-4.22e-06	0.453002	10.6218
