# Supplementary material for: Systems Modeling of Molecular Mechanisms Controlling Cytokine-driven CD4+ T Cell Differentiation and Phenotype Plasticity
Source: PLoS Comput Biol. 2013 Apr 4;9(4):e1003027. doi: 10.1371/journal.pcbi.1003027 (PMC3617204; doi:10.1371/journal.pcbi.1003027)
Supplement: Table S5 — Comprehensive summary of stimuli input versus molecule expression output. The four CD4+ T cell phenotypes by a variety of external stimuli represented in the second column. These external stimuli cause upregulation of molecules represented in the third column and downregulation of the molecules represented in the fourth column. (XLSX) [file pcbi.1003027.s018.xlsx]

## Sheet: Sheet1
	Phenotype	External stimuli to induce	Upregulation	Downregulation
	Th1	eIFNγ	IFNγ	IL-4
		eIL-12	STAT1-P	GATA3-P
		eIL-18	Tbet-P	IL-17
		αIL-4	IL-12	aFOXP3
			IL-18	STAT3-P
			IRAK1-P	STAT6-P
				RORγt
	Th2	eIL-4	IL-4	IL-17
		αIFNγ	GATA3-P	aFOXP3
			STAT6-P	STAT3-P
				STAT1-P
				IFNγ
				Tbet-P
				IRAK1-P
				IL-18
				IL-12
				RORγt
	Th17	eIL-6	IL-17	aFOXP3
		eTGF-β	RORγt	STAT1-P
			STAT3-P	IFNγ
			IL6	Tbet-P
			TGFβ	GATA3-P
				IL-4
				STAT6-P
				IL-12
				IL-18
	iTreg	eTGF-β	aFOXP3	IL-17
		IL-2	TGF-β	RORγt
				STAT3-P
				STAT6-P
				GATA3-P
				IL-4
				IFNγ
				Tbet-P
				STAT1-P
				IL-12
				IL-18
