# Supplementary material for: Systems Modeling of Molecular Mechanisms Controlling Cytokine-driven CD4+ T Cell Differentiation and Phenotype Plasticity
Source: PLoS Comput Biol. 2013 Apr 4;9(4):e1003027. doi: 10.1371/journal.pcbi.1003027 (PMC3617204; doi:10.1371/journal.pcbi.1003027)
Supplement: Table S6 — Table of predictions derived from the CD4+ T cell computational model. The CD4+ T cell differentiation model predicted behaviors 1–4 at a post-calibration stage. These predictions are the results of in silico experimentation using scans, time-courses and loss-of-function approaches. (XLSX) [file pcbi.1003027.s019.xlsx]

## Sheet: Sheet1
	No.	Modeling Predictions
	#1	PPARγ plays and essential role in modulating the differentiation and plasticity of CD4+ T cells
	#2	IL-21 can modulate Th17-specific CD4+ T cell responses and promote the crosstalk between Th1 and Th17
	#3	PPARγ controls the cross-talk between Th1 and Th17 differentiation
	#4	PPARg promotes Th2 differentiation using a positive feedback loop with IL-4 as a main driver and downregulates IFNg-mediated Th1 responses
	#5	IL-2 modulates Th17 differentiation processes by impairing the IL-2/TGFβ induced iTreg cells through a STAT5 dependent mechanism
